# Supplementary material for: A new interpretation of SAXS peaks in sulfonated poly(ether ether ketone) (sPEEK) membranes for fuel cells
Source: Royal Society of Chemistry journal article supplement (doi:10.1039/c4cp00710g), 2014-01-01
Supplement: c4cp00710g1.pdf [file c4cp00710g1.pdf]

## Electronic Supplementary Information for

### A new interpretation of SAXS peaks in sulfonated poly(ether ether ketone) (sPEEK) membranes for fuel cell

H. Mendil-Jakani\*, I. Zamanillo Lopez, P. M. Legrand, V. H. Mareau and L. Gonon

*Structure et Propriétés d'Architectures Moléculaires, UMR 5819 SPrAM (CEA-CNRS-UJF),  
CEA-Grenoble, 17, rue des Martyrs, 38054 Grenoble, Cedex 9, France.*

\*corresponding author: [hakima.mendil-jakani@cea.fr](mailto:hakima.mendil-jakani@cea.fr)

#### **Impact of the IEC on the crystallinity**

The fact that a small-angle matrix peak can be observed for semi-crystalline membranes has been previously established for perfluorosulfonated ionomers<sup>1,2</sup>.

The supporting information displays the WAXD spectra of sPEEK membranes for different IEC.

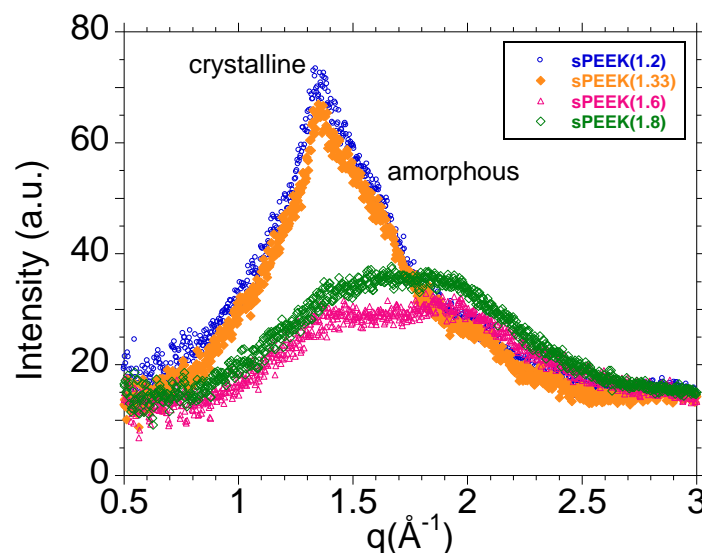

WAXD spectra of sPEEK(1.2)(○), sPEEK(1.33)(◇), sPEEK(1.6)(△), sPEEK(1.8)(◇) membranes in H<sup>+</sup> form, after 96h of immersion at 80°C. The spectra were recorded in transmission geometry at room temperature and humidity.

The sPEEK(1.2) and (1.33) WAXD spectra clearly exhibit a sharp crystalline peak, located at about 1.37 Å<sup>-1</sup>, this peak being superimposed to an amorphous halo centered around 1.6 Å<sup>-1</sup>.

sPEEK membranes with similar degrees of sulfonation already showed crystallinity<sup>3</sup>. For sPEEK(1.6) and sPEEK(1.8), one can observe that the WAXD profiles broaden. The crystalline peak of sPEEK(1.6) is very weak, whereas only the amorphous halo remains for sPEEK(1.8).

## References

1. Fujimura, M.; Hashimoto, T.; Kawai, H. *Macromolecules* 1981, 14, (5), 1309-1315.
2. Gebel, G.; Aldebert, P.; Pineri, M. *Macromolecules* 1987, 20, (6), 1425-1428.
3. Carbone, A.; Pedicini, R.; Portale, G.; Longo, A.; D'Ilario, L., *et al. Journal of Power Sources* 2006, 163, (1), 18-26.
